# Supplementary material
Source: PubMed Central journal article supplement (PMC2891368)

Supplementary Figure S1

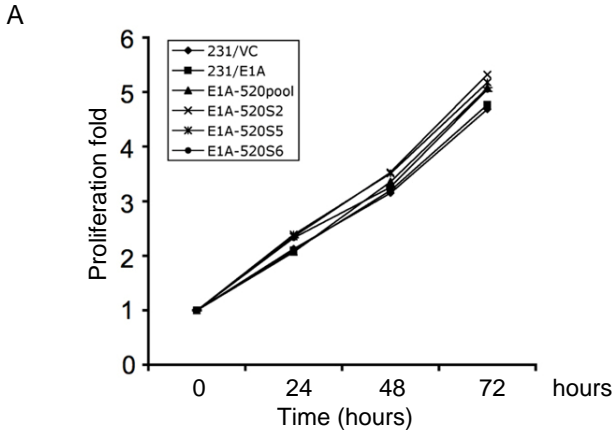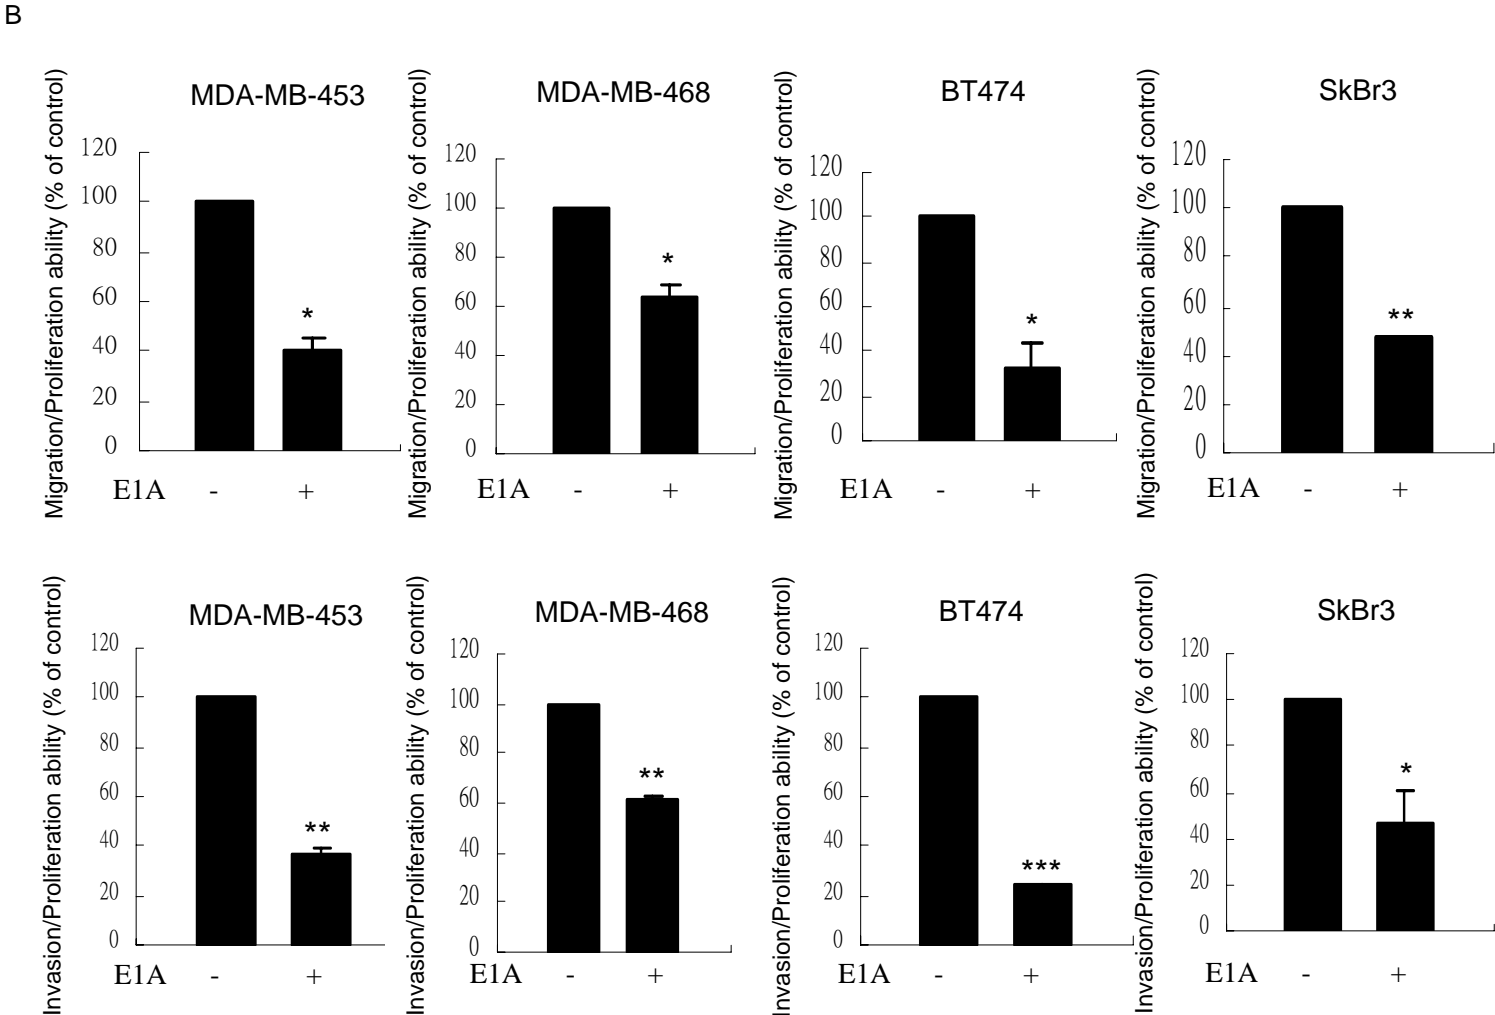

Supplementary Figure S2

A

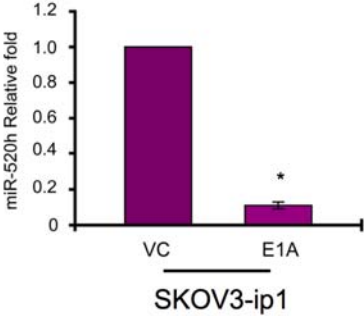

B

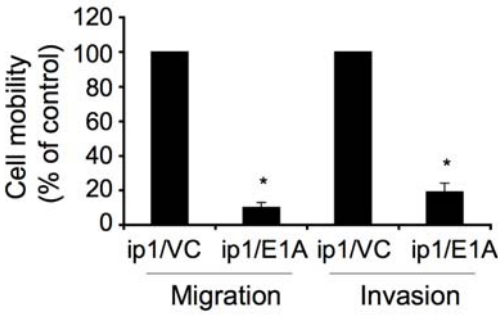

C

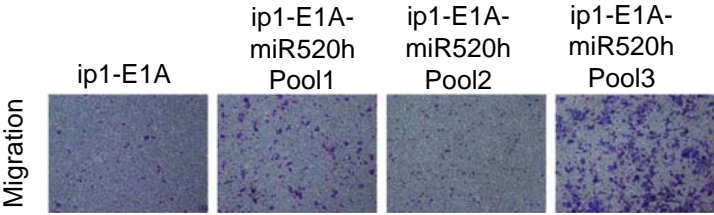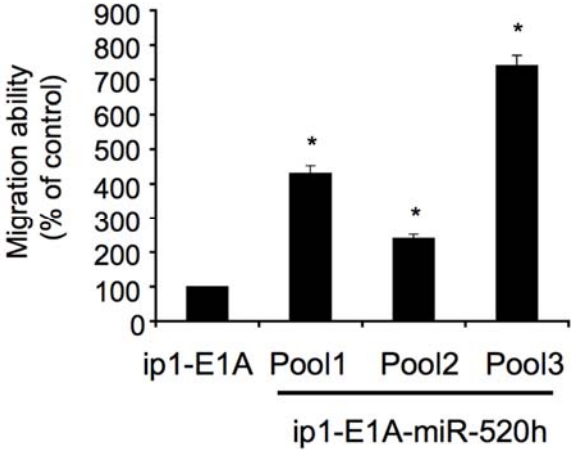

D

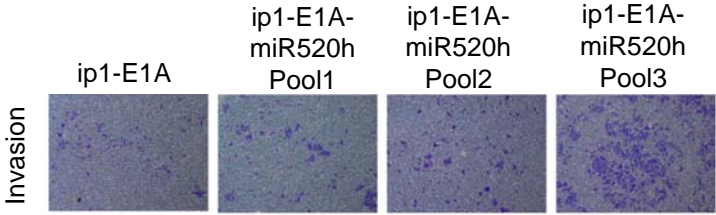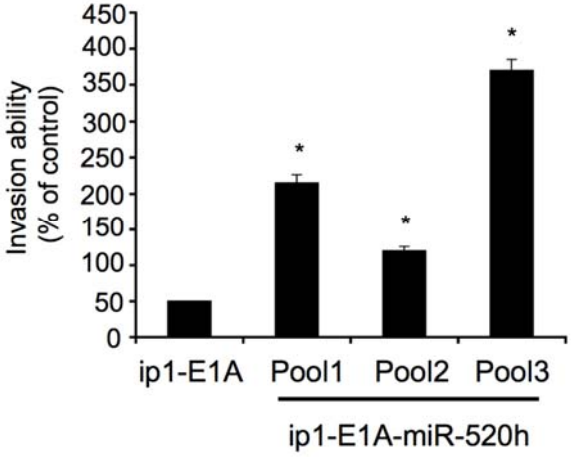

Supplementary Figure S3

A

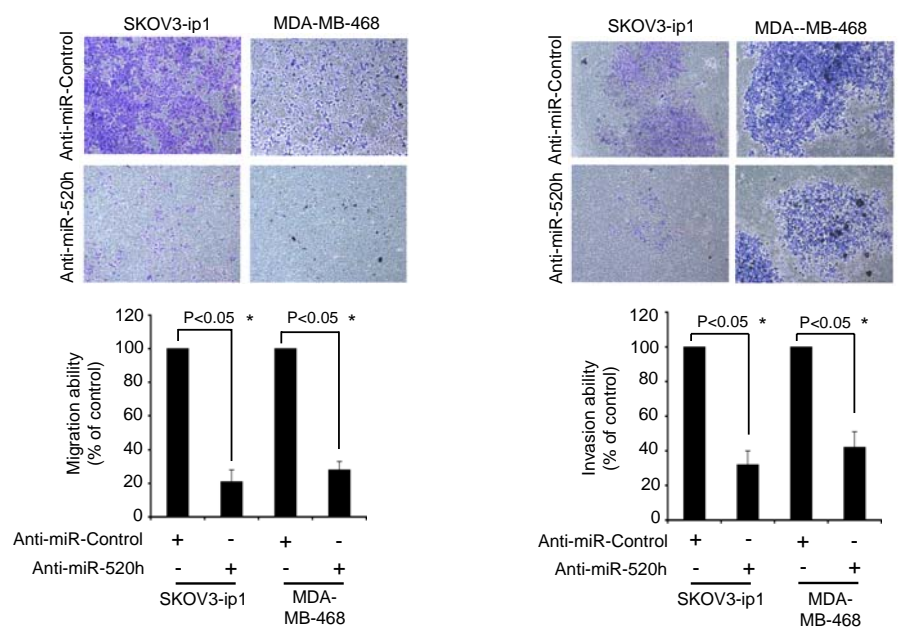

B

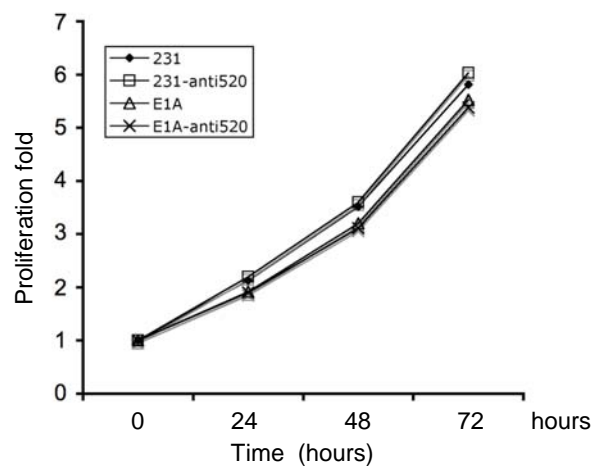

Supplementary Figure S4

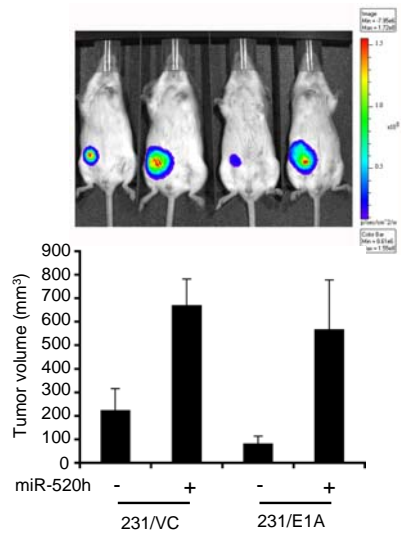

Supplementary Figure S5

A

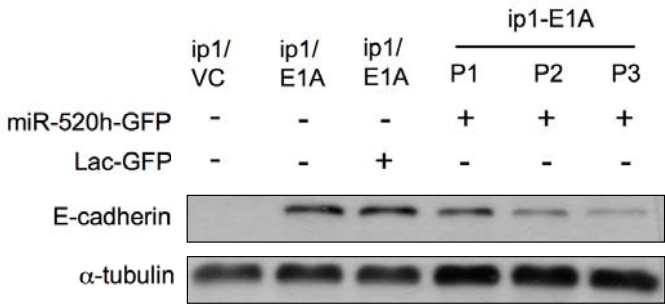

B

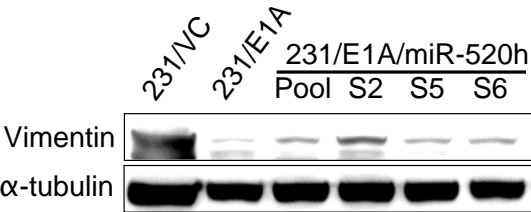

C

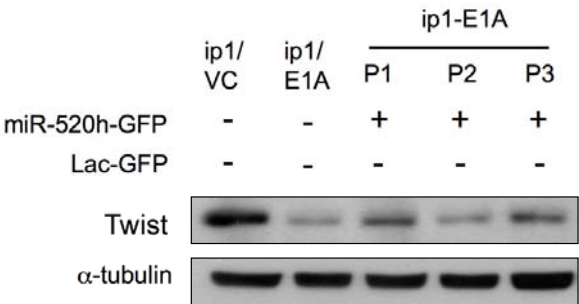

D

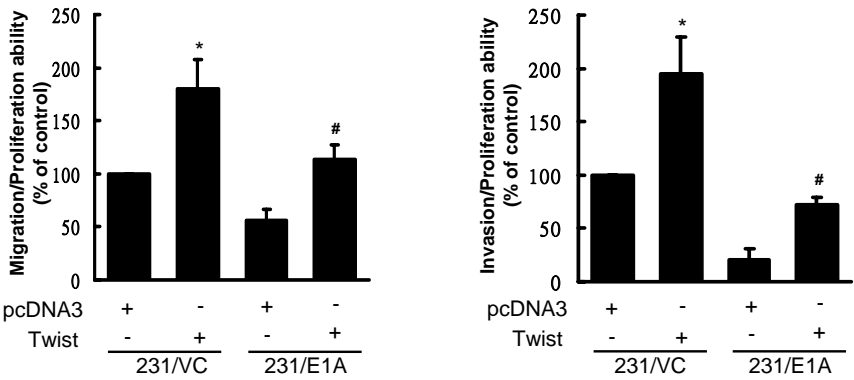

Supplementary Figure S6

**miRanda** miRNA: 3' UGAGAUUCCCUUCGUGAAACA 5' hsa-mir-520h  
|| :|: || : |||||  
Target:5' ACATTGGTGTGCACTTGT 3' 3'UTR of PP2A/C

**TargetScan** miRNA: 3' -----UGAGAUUCCCUUCGUGAAACA 5' hsa-mir-520h  
|| :|: || |||||  
Target:5' UUUACAUAUUACA AUUUGUCACAUUGUUGGUGGCACUUUGUG 3' 3'UTR of PP2A/C

**RNAhybrid** miRNA: 3' -UGAGAUUCCCUUCGUGAAACA- 5' hsa-mir-520h  
|| +|: || |||||  
Target:5' CACAUUGUUGGUGGCACUUUGUG 3' 3'UTR of PP2A/C

Supplementary Figure S7

A

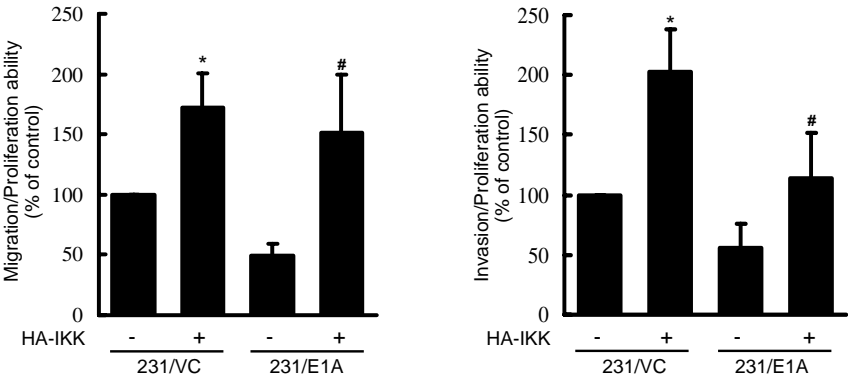

B

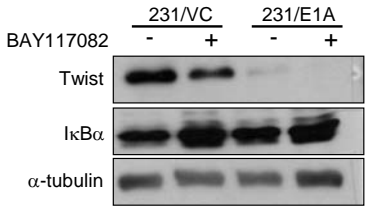

Supplement: NIHMS197113-supplement-1.pdf [file NIHMS197113-supplement-1.pdf]
